# Supplementary material
Source: PubMed Central journal article supplement (PMC164662)

**A****NK cells Jasplakinolide**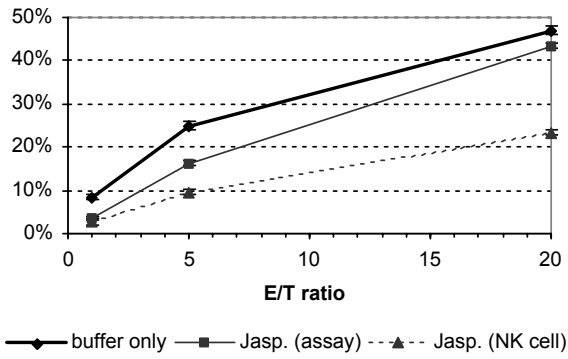**B****NK cells Jasplakinolide**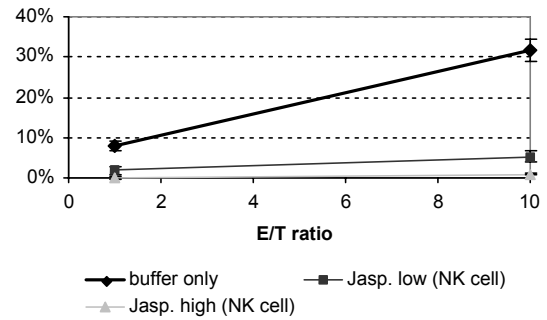**C****NK cells Nocodazole**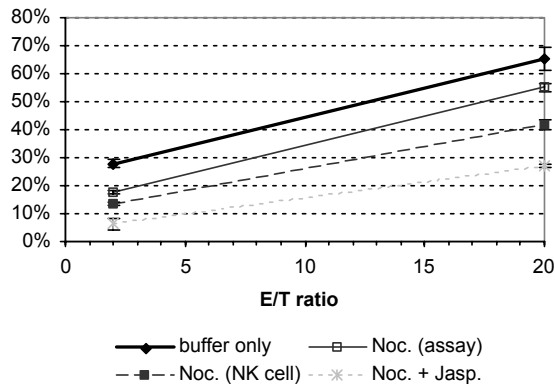**D****CTLs Jasplakinolide**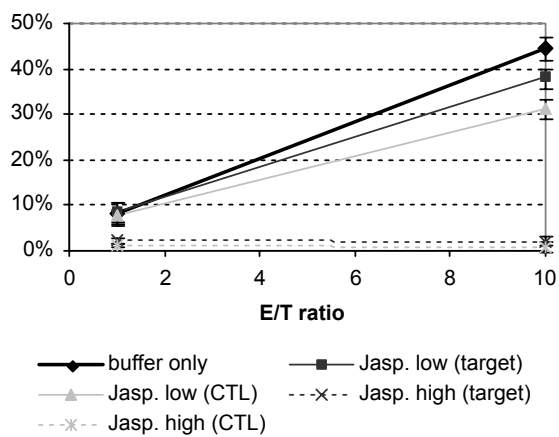**E****CTLs Nocodazole**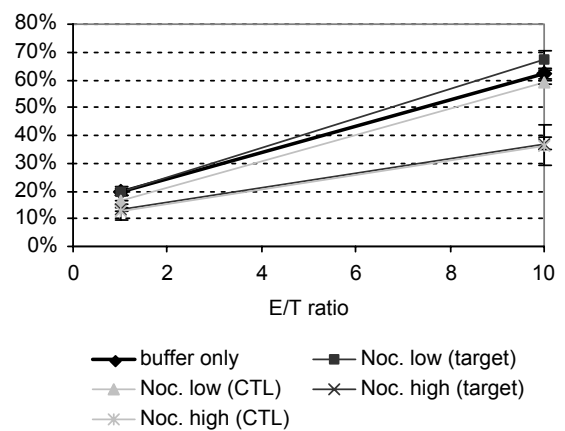

Supplement: pnas_1336920100_25.pdf [file pnas_1336920100_25.pdf]
