# Supplementary material
Source: PubMed Central journal article supplement (PMC164662)

**A**

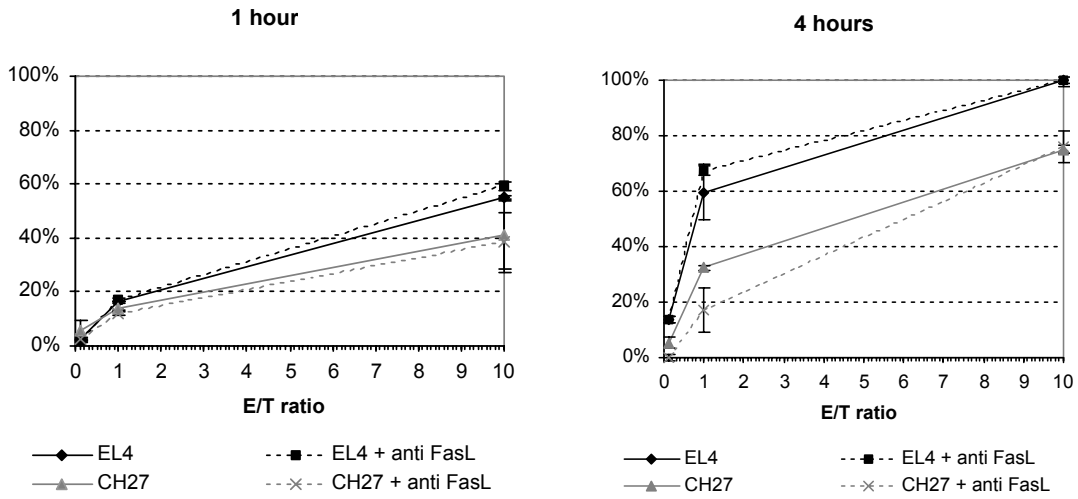

**B**

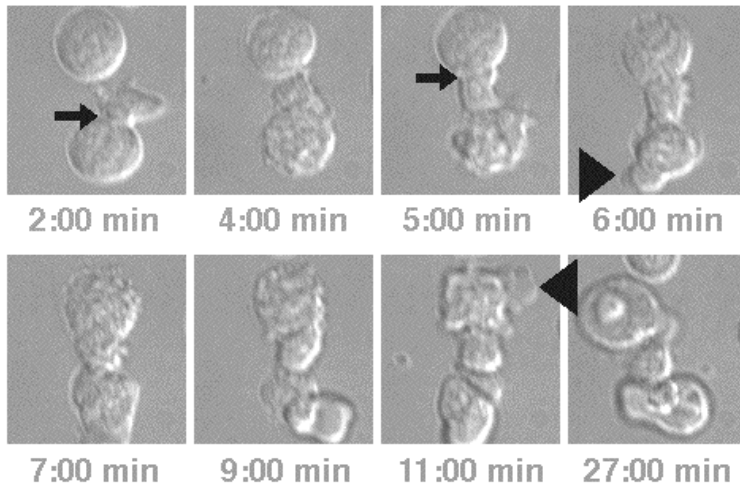

**C**

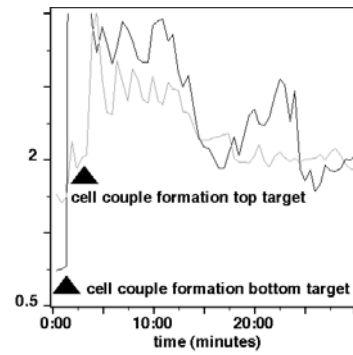

**D**

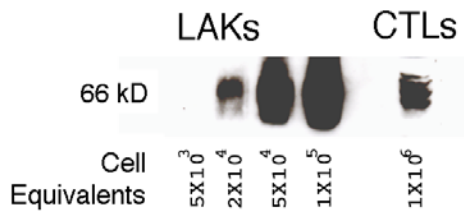

Supplement: pnas_1336920100_13.pdf [file pnas_1336920100_13.pdf]

# A

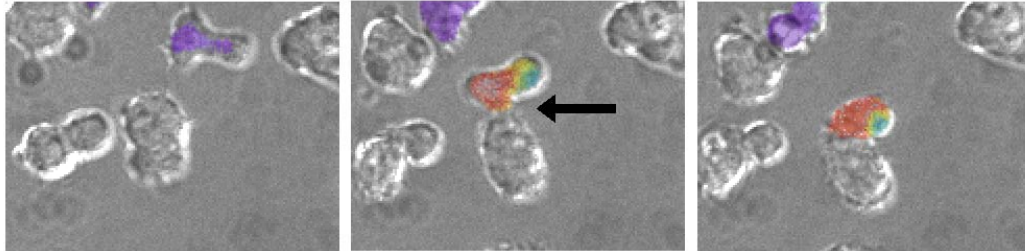

-1:00 min

0:00 min

0:20 min

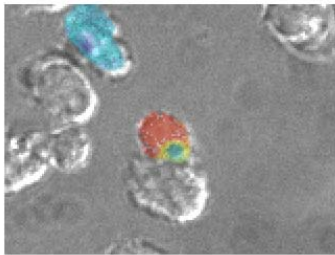

1:00 min

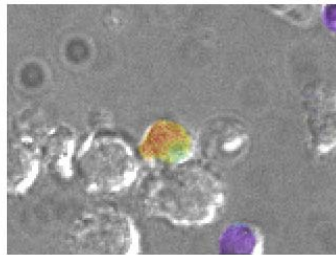

3:00 min

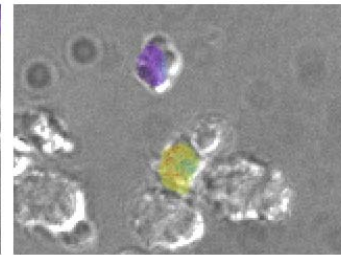

6:00 min

# B

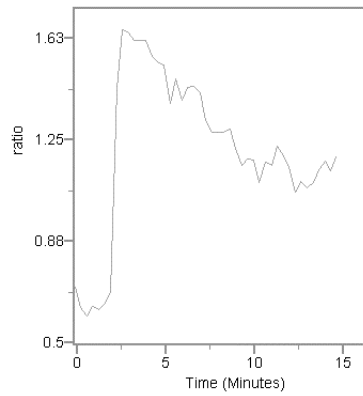

Supplement: pnas_1336920100_15.pdf [file pnas_1336920100_15.pdf]

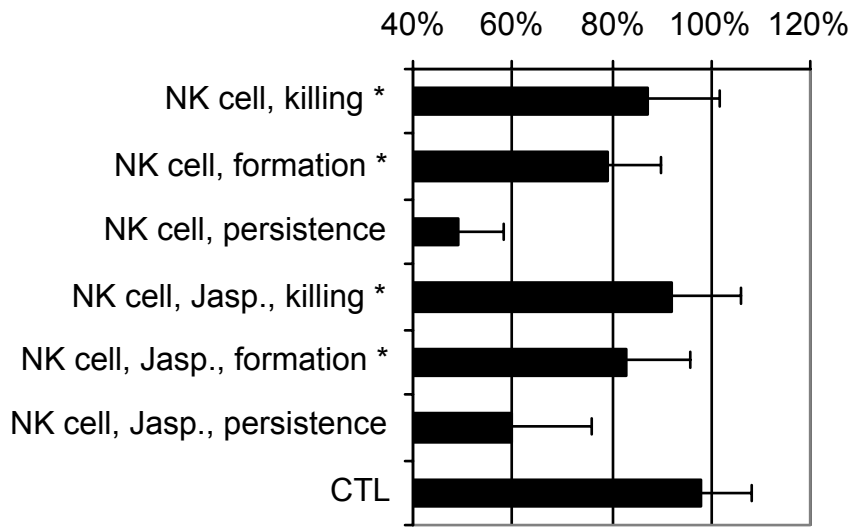

Supplement: pnas_1336920100_17.pdf [file pnas_1336920100_17.pdf]

# A

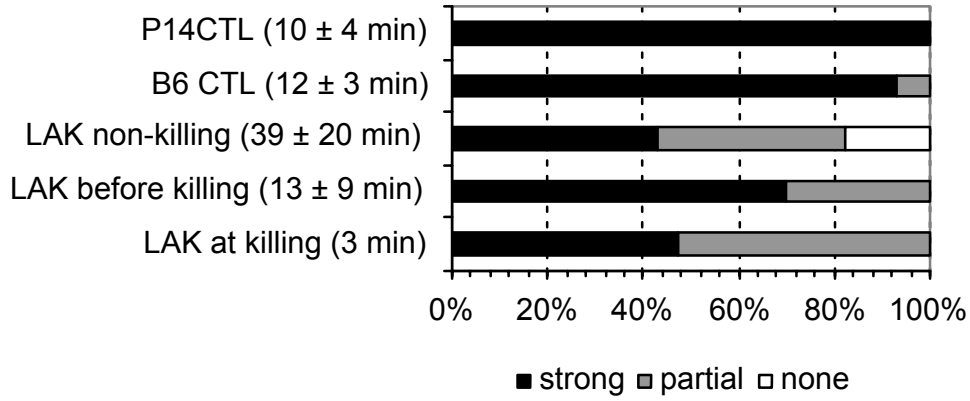

# B

Strong actin accumulation

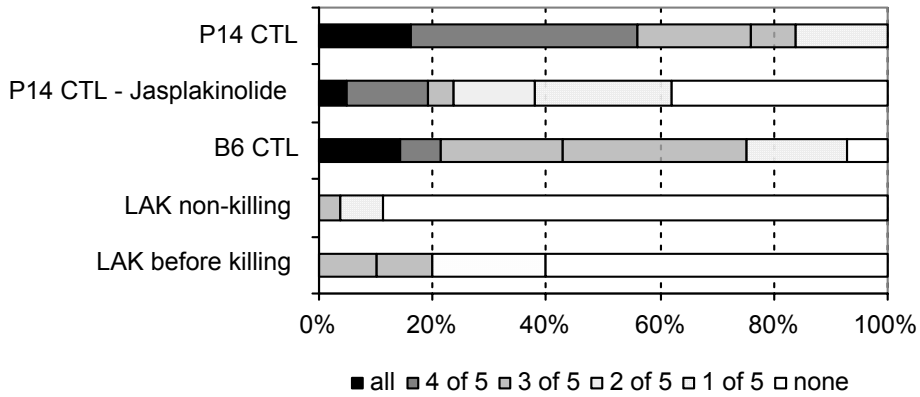

Partial or strong actin accumulation

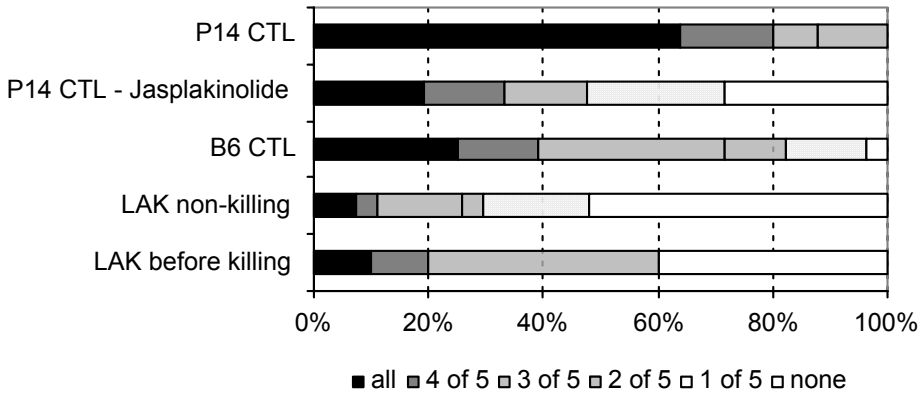

Supplement: pnas_1336920100_19.pdf [file pnas_1336920100_19.pdf]

# A

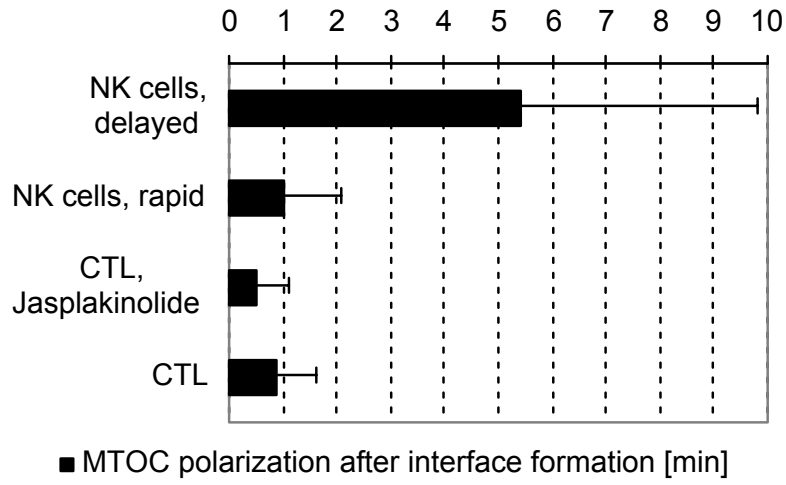

# B

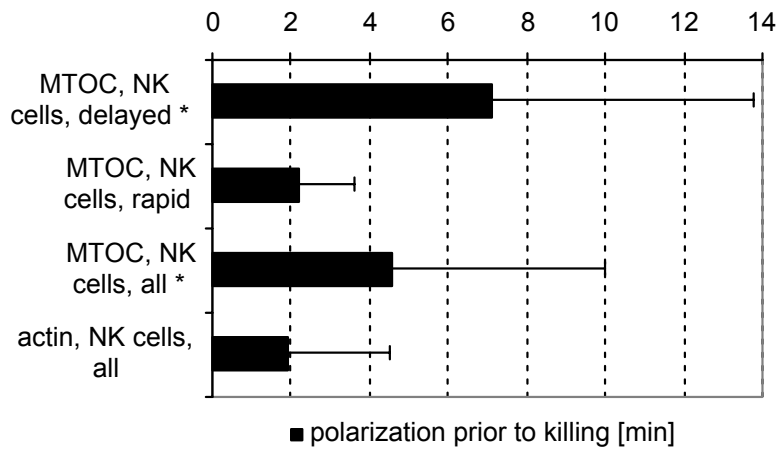

Supplement: pnas_1336920100_21.pdf [file pnas_1336920100_21.pdf]

### B6 CTL redirected lysis, 1 hour

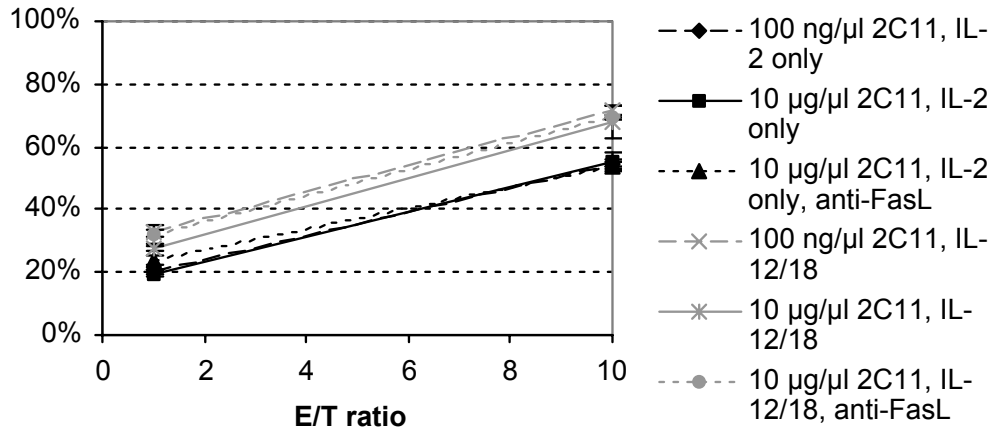

Supplement: pnas_1336920100_23.pdf [file pnas_1336920100_23.pdf]

# A

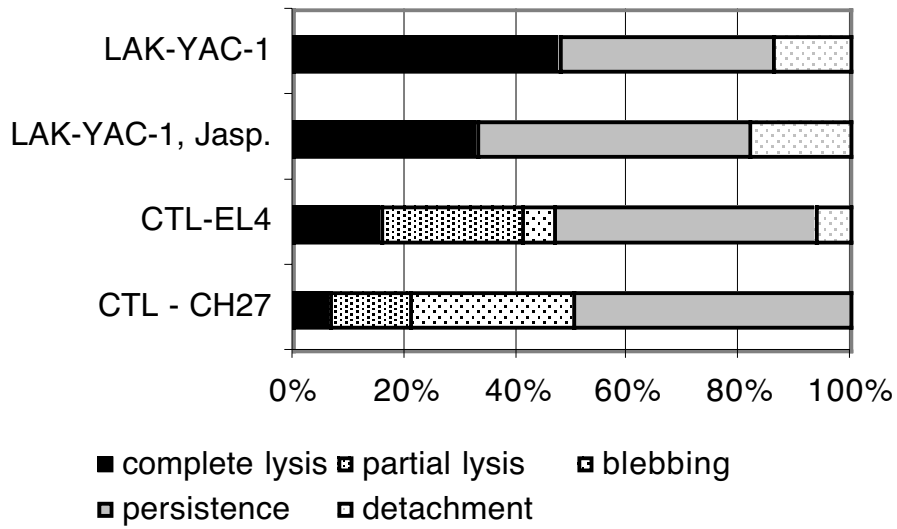

# B

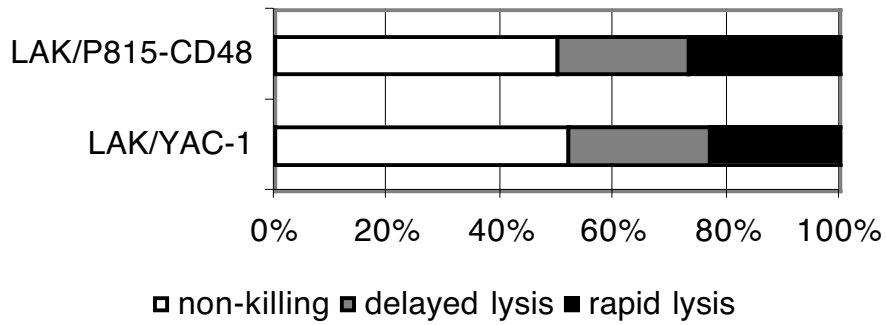

Supplement: pnas_1336920100_27.pdf [file pnas_1336920100_27.pdf]
